# Supplementary material for: Efficient Nanocrystal Photovoltaics via Blade Coating Active Layer
Source: MDPI journal article supplement (doi:10.3390/nano11061522), 2021-06-09
Supplement: s1 [file s1]

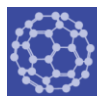

# Supplementary Materials: Efficient Nanocrystal Photovoltaics via Blade Coating Active Layer

Kening Xiao <sup>1</sup>, Qichuan Huang <sup>1</sup>, Jia Luo <sup>1</sup>, Huansong Tang <sup>1</sup>, Ao Xu <sup>1</sup>, Pu Wang <sup>1</sup>, Hao Ren <sup>1</sup>, Donghuan Qin <sup>1,2,\*</sup>, Wei Xu <sup>1,2,\*</sup> and Dan Wang <sup>1,2,\*</sup>

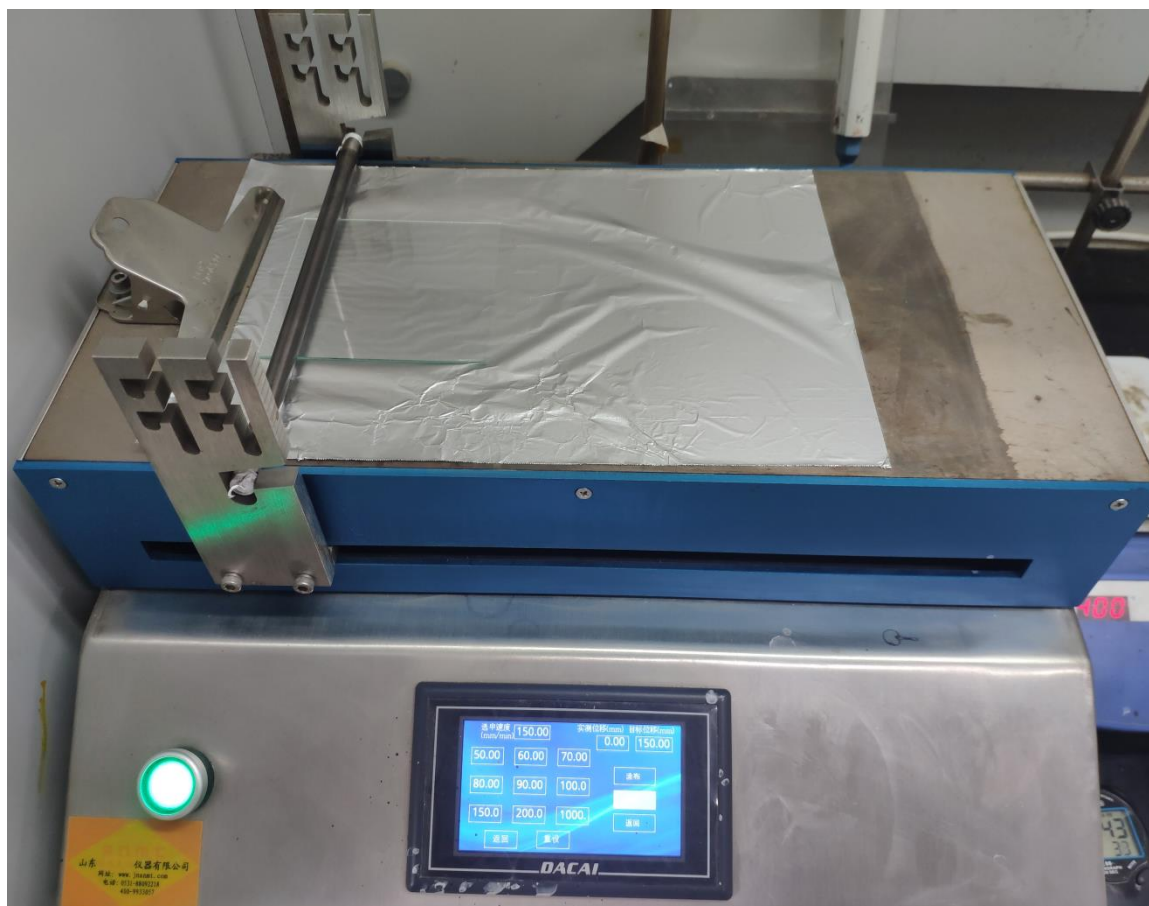

Figure S1. Equipment for doctor-blading preparation devices.

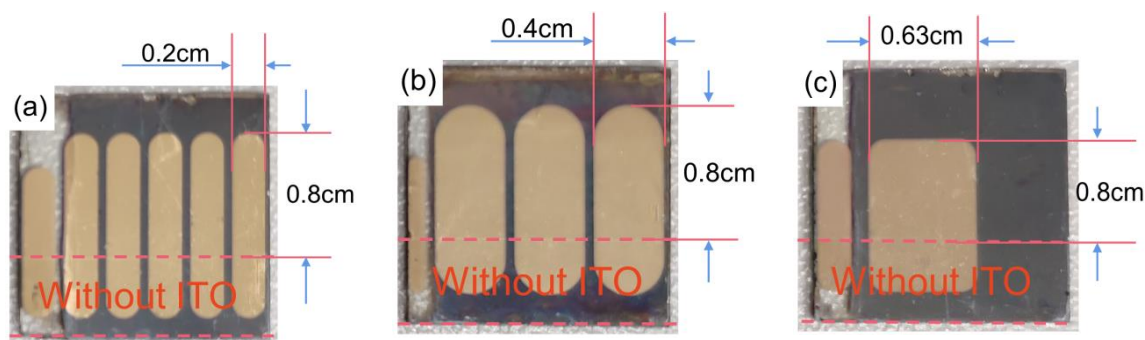

Figure S2. Devices with different active areas (a) 0.16 cm<sup>2</sup>; (b) 0.3 cm<sup>2</sup>; (c) 0.5 cm<sup>2</sup>.

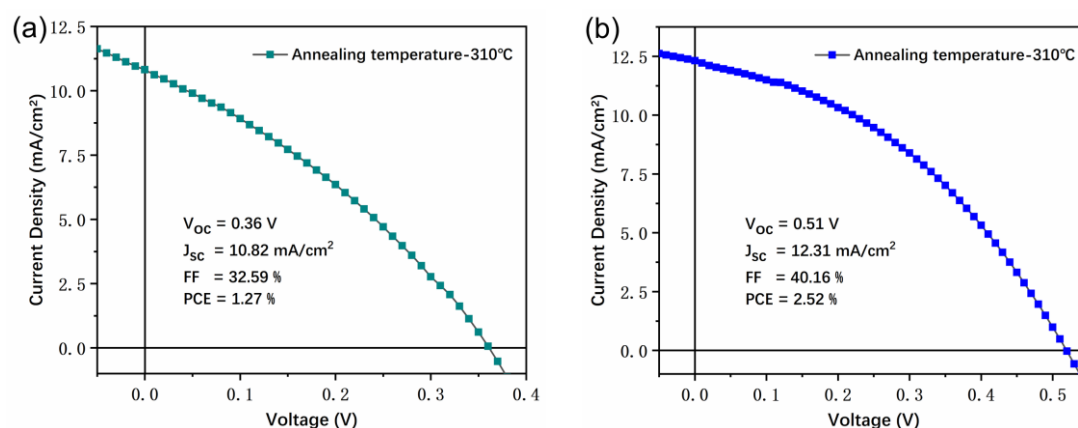

**Figure S3.** J–V curves of ITO/ZnO/CdSe/CdTe/Au with different CdTe layers at 310 °C (a) three layers (b) five layers.

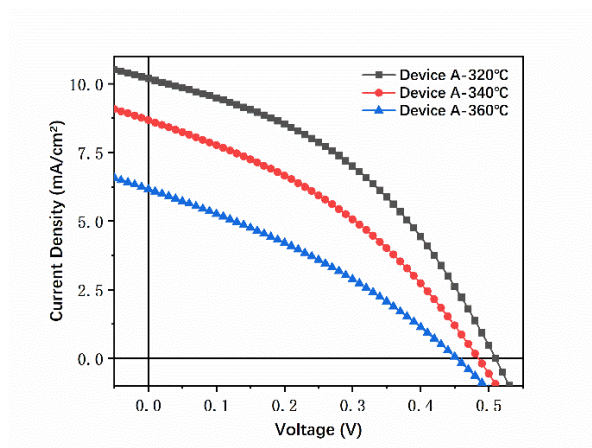

**Figure S4.** J–V curves of ITO/ZnO/CdSe/CdTe/Au at different annealing temperatures (Device A:320 °C, Device B:340 °C, Device C:360 °C) under light with 0.5 cm² active area.

**Table S1.** Summarized performance of NC solar cells with different annealing temperatures (Figure S4).

| Device | Temperature (°C) | $V_{oc}$ (V) | $J_{sc}$ (mA/cm²) | FF (%) | PCE (%) |
|--------|------------------|--------------|-------------------|--------|---------|
| A      | 320              | 0.50         | 10.19             | 41.40  | 2.11    |
| B      | 340              | 0.48         | 8.67              | 36.59  | 1.52    |
| C      | 360              | 0.45         | 6.16              | 32.39  | 0.90    |

## Equipment information

The cross-section diagram was obtained from Zeiss Sigma300's scanning electron microscope (SEM). The atomic force microscopy (AFM) images were obtained using a NanoScope NS3A system (Veeco, CA, USA). The external quantum efficiency (EQE) was measured by a Zolix instrument (Solar Cell Scan100, Zolix Instruments Co., Ltd., Beijing, China). The J–V characteristics were measured with a Keithley 2400 under an illumination of 100 mW/cm² with an air mass 1.5 (AM 1.5) solar simulator (Oriel model 91192).
